# Supplementary material
Source: PubMed Central journal article supplement (PMC6328054)
Supplement: NIHMS999371-supplement-SupplementaryMaterial.pdf [file NIHMS999371-supplement-SupplementaryMaterial.pdf]

**Development and internal validation of an aneurysm rupture probability model based on patient characteristics and aneurysm location, morphology, and hemodynamics –  
Supplementary Material**

Felicitas J. Detmer, Bong Jae Chung, Fernando Mut, Martin Slawski,  
Farid Hamzei-Sichani, Christopher Putman, Carlos Jimenez, Juan R. Cebal

**Corresponding Author:**

Felicitas J. Detmer  
Bioengineering Department  
Volgenau School of Engineering  
George Mason University  
4400 University Drive  
Fairfax, VA 22030, USA  
Email: [fdetmer@gmu.edu](mailto:fdetmer@gmu.edu)

**Table 1** Distribution of aneurysms by aneurysm size. R and U refer to the number of ruptured and unruptured aneurysms for that group, respectively. The last row shows the relative number of ruptured aneurysms per group

| <b>Aneurysm Size [cm]</b> | <b>0-0.2</b> | <b>0.2-0.7</b> | <b>0.7-1.2</b> | <b>1.2-2.5</b> | <b>&gt;2.5</b> |
|---------------------------|--------------|----------------|----------------|----------------|----------------|
| <b>R</b>                  | 2            | 263            | 176            | 50             | 1              |
| <b>U</b>                  | 56           | 728            | 262            | 90             | 3              |
| <b>Rupture (%)</b>        | 3.45         | 26.54          | 40.18          | 35.71          | 25             |
